# Supplementary material
Source: PubMed Central journal article supplement (PMC6461993)
Supplement: 41422_2019_152_MOESM1_ESM.pdf [file 41422_2019_152_MOESM1_ESM.pdf]

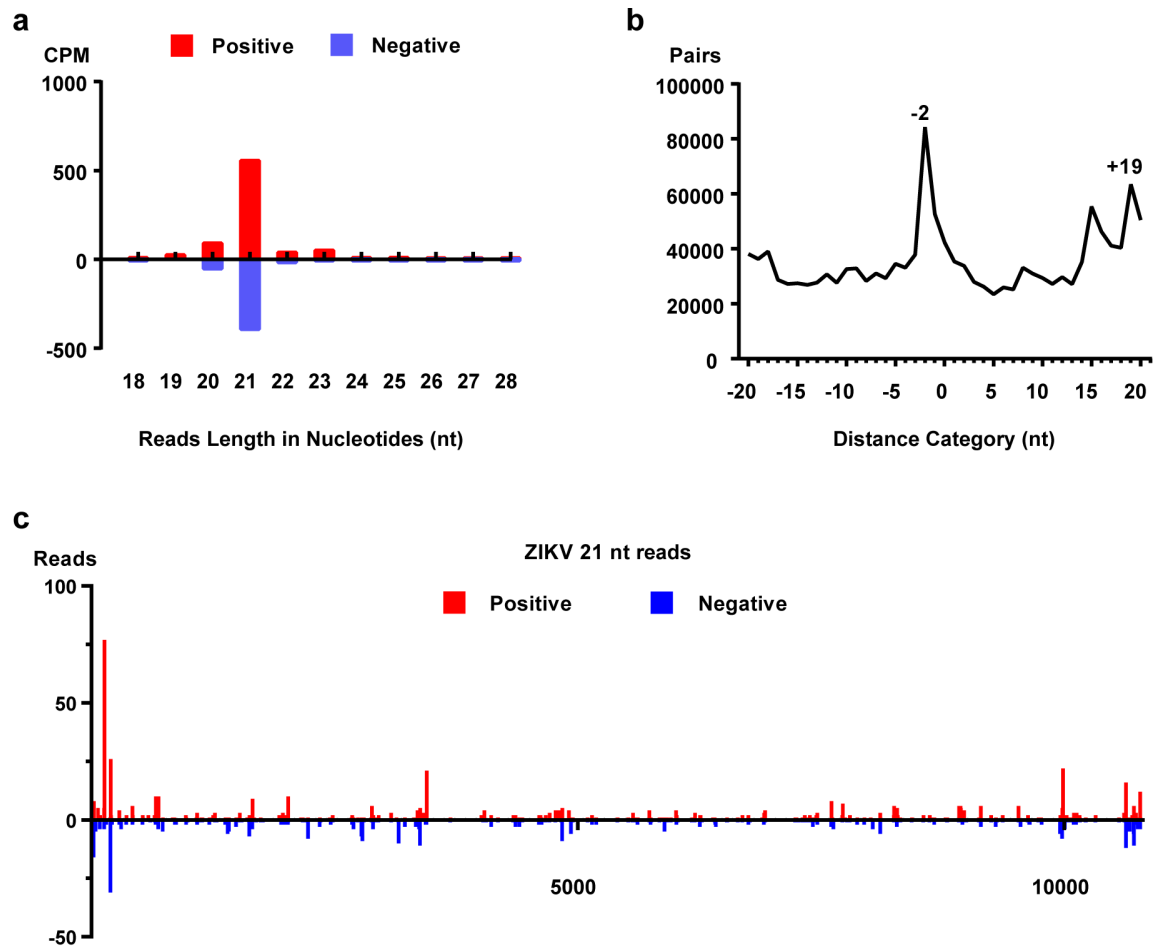

**Fig. S1. The production of vsiRNAs in ZIKV-infected mosquito Aag2 cells.**

Aag2 cells were infected with ZIKV (strain GZ01) at an MOI of 2, and total RNAs were extracted and subjected to deep sequencing at 96 hours post infection (h.p.i.). **a**, The size distribution and abundance (counts per million of total reads, CPM) of total vsRNAs. Red, positive-stranded vsRNAs; blue, negative-stranded vsRNAs. **b**, Total pairs of complementary 21-nt vsRNAs derived from ZIKV in each distance category between the 5' and 3' ends of a complementary vsRNA pair, showed as -2 for pairs with 2-nt overhang at the 3' end of each strand defined as the canonical viral siRNAs (vsiRNAs). **c**, Distribution of vsRNA reads (21 nt size) in the positive-stranded genome and negative-stranded anti-genome of ZIKV and the relative abundances of positive- and negative stranded vsiRNAs are indicated.
