# Supplementary material
Source: PubMed Central journal article supplement (PMC6461993)
Supplement: 41422_2019_152_MOESM2_ESM.pdf [file 41422_2019_152_MOESM2_ESM.pdf]

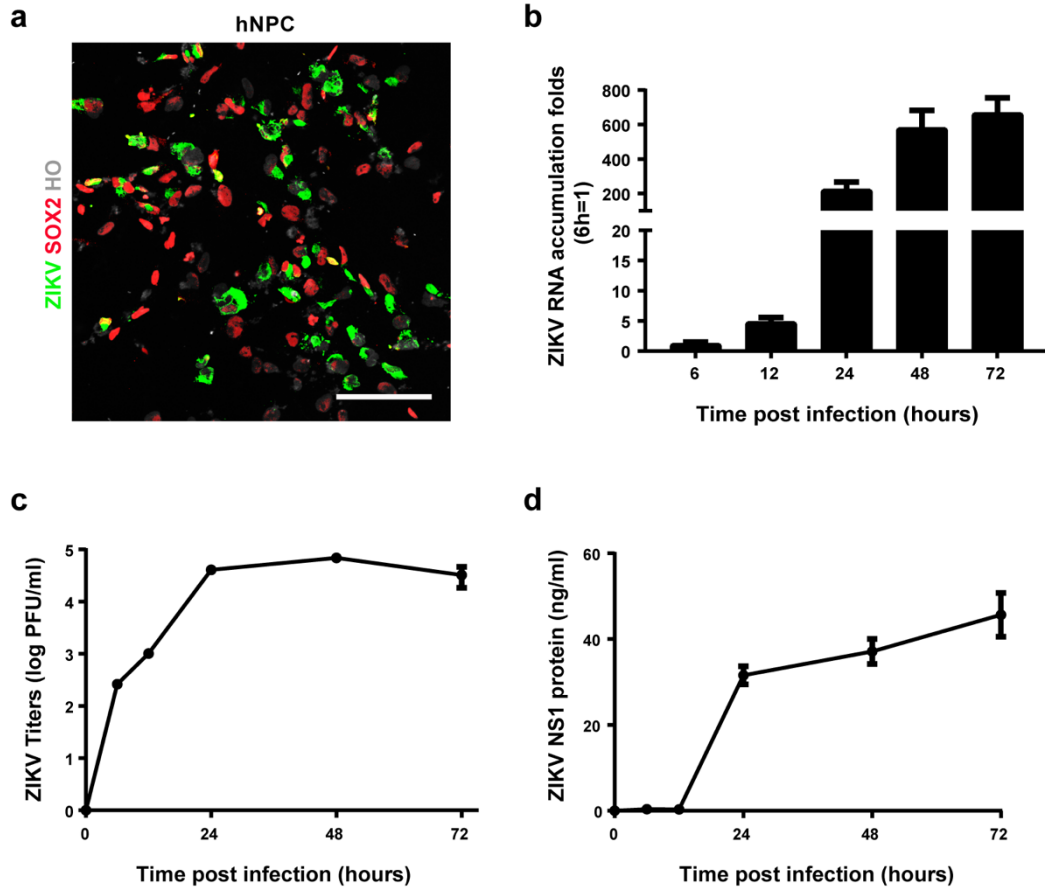

**Fig. S2. ZIKV productively infected and replicated in hNPCs.**

hNPCs were infected with ZIKV at an MOI of 2. **a**, Immunofluorescence assays were performed at 48 h.p.i. using specific antibodies against ZIKV E (Green), SOX2 (Red) and HO (Gray), respectively. Scale bar, 20  $\mu$ m. **b**, ZIKV genome RNA copy numbers in hNPCs were determined by RT-qPCR at the indicated time points, and the viral RNA accumulation refer to GADPH. **c**, The growth curve of ZIKV was determined by standard plaque assays. **d**, Levels of ZIKV NS1 protein released in culture supernatant were determined by ELISA.
