# Supplementary material
Source: PubMed Central journal article supplement (PMC6461993)
Supplement: 41422_2019_152_MOESM3_ESM.pdf [file 41422_2019_152_MOESM3_ESM.pdf]

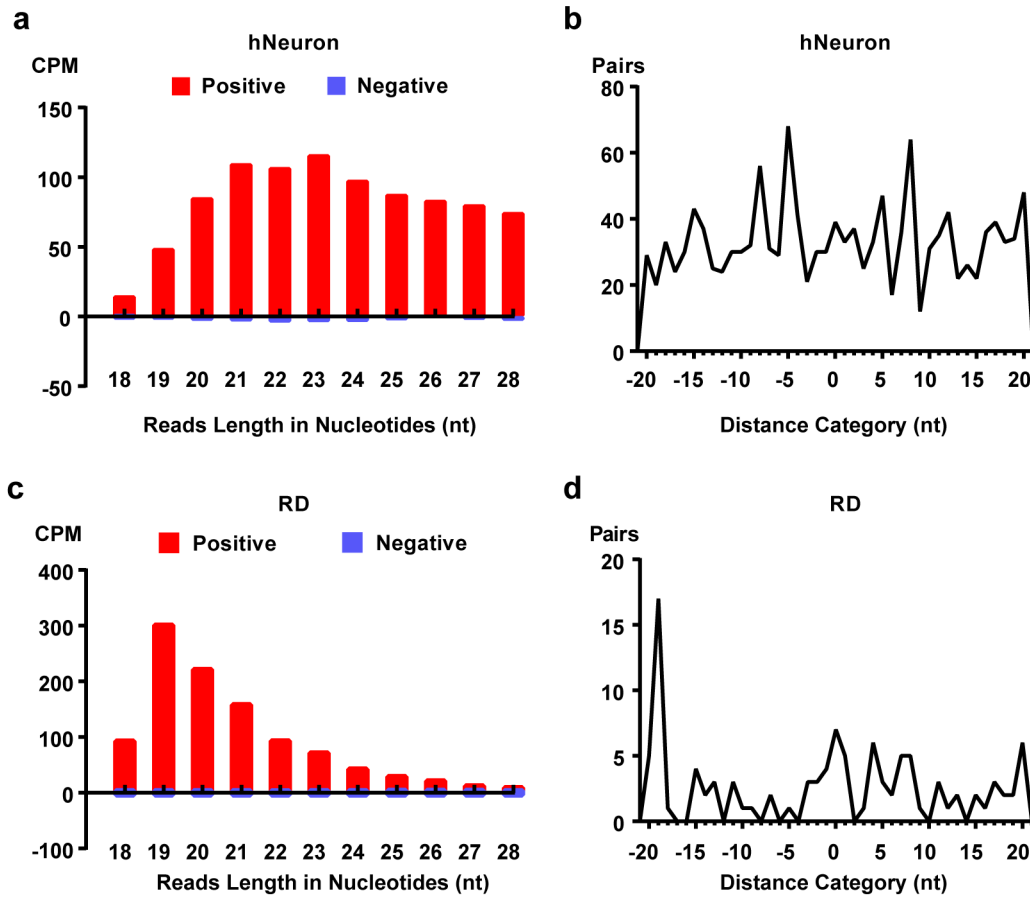

**Fig. S3. The absence of vsRNA in ZIKV-infected hNeurons and RD cells.**

Human neurons (hNeuron) that differentiated from hNPCs (**a**, **b**) and RD cells (**c**, **d**) were infected with ZIKV (strain GZ01) at an MOI of 2, and deep sequencings were performed at 48 h.p.i. The size distribution and abundance (CPM) of total vsRNAs in hNeuron (**a**) and RD (**c**) cells were calculated accordingly. Red, positive-stranded vsRNAs; blue, negative-stranded vsRNAs. Total pairs of complementary 22-nt vsRNAs in each distance category between the 5' - and 3' - ends of a complementary vsRNA pair in hNeuron (**b**) and RD cells (**d**), showed as -2 for pairs with a 2-nt overhang at the 3' - end of each strand.
