# Supplementary material
Source: PubMed Central journal article supplement (PMC6461993)
Supplement: 41422_2019_152_MOESM4_ESM.pdf [file 41422_2019_152_MOESM4_ESM.pdf]

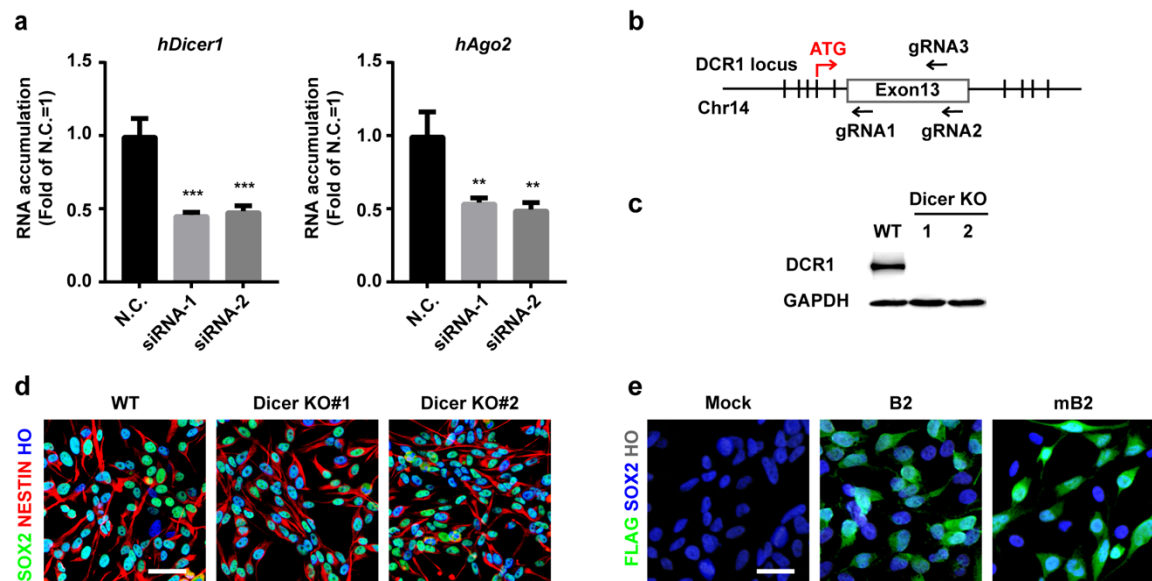

**Fig. S4. Characterization of Dicer1/Ago2 and NoV B2/mB2 expression in hNPCs.**

**a**, The Dicer1/Ago2 gene expression in hNPCs transfected with non-targeting siRNA (N.C.) or two sets of specific siRNAs (Supplementary Table 4) were analyzed by RT-qPCR. All data are shown as the means  $\pm$  SD of three independent experiments, one-way ANOVA, \*\*  $p < 0.01$ , \*\*\*  $p < 0.001$ . **b**, Three gRNAs are designed to target human DICER1 locus (Supplementary Table 2). **c**, Western blotting showing the DCR1 expression in the KO and control hNPC clones. **d**, Immunostaining assays of hNPC markers, SOX2 and NESTIN, in the two Dicer KO hNPC clones. Scale bar: 50  $\mu$ m. **e**, the expressions of NoV B2 and mB2 proteins in the transfected hNPCs were detected by immunostaining assays. Flag (Green) and SOX2 (Blue). Scale bar, 20  $\mu$ m.
