# Supplementary material
Source: PubMed Central journal article supplement (PMC6461993)
Supplement: 41422_2019_152_MOESM5_ESM.pdf [file 41422_2019_152_MOESM5_ESM.pdf]

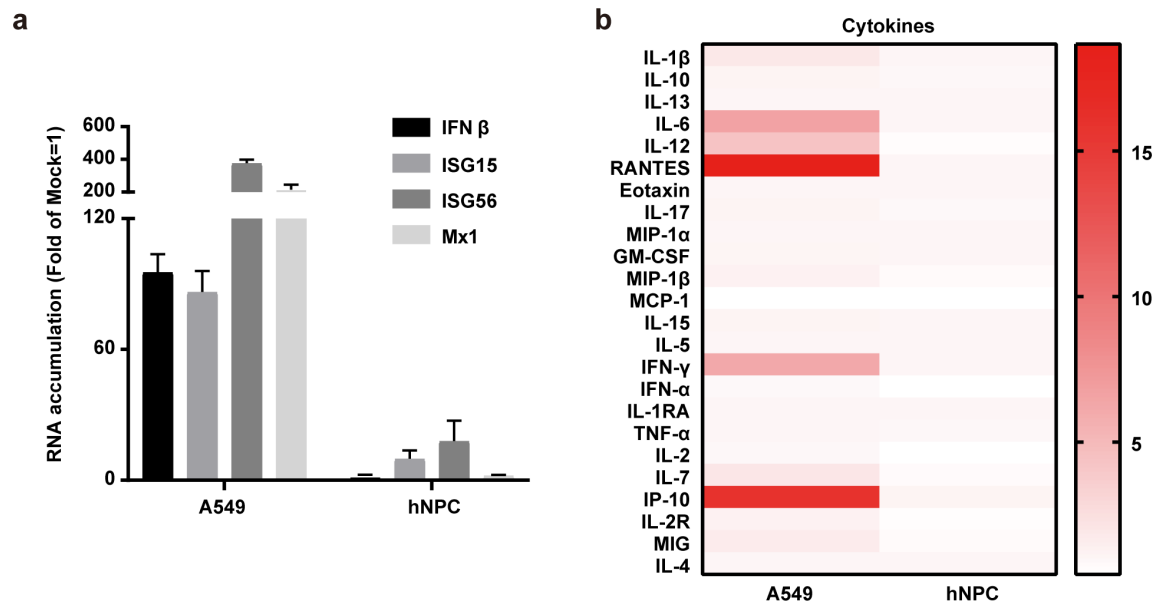

**Fig. S5. ZIKV infection induces a weaker IFN induction and response in hNPCs than that in A549 cells.**

Human A549 cells and hNPCs were infected with ZIKV (strain GZ01) at an MOI of 2. **a**, The RNA levels of IFN pathway genes in cells were analyzed by RT-qPCR (Supplementary Table 3). All data are from independent repeats and shown as the means  $\pm$  SD. **b**, Levels of selected cytokines in cell culture supernatants were detected by Luminex<sup>®</sup> 200<sup>™</sup> according to the manufacturer's instructions. The experiments were independently repeated for three times. The results are showed in the form of a heat map generated using GraphPad Prism 7.01.
