# Supplementary material
Source: PubMed Central journal article supplement (PMC6461993)
Supplement: 41422_2019_152_MOESM6_ESM.pdf [file 41422_2019_152_MOESM6_ESM.pdf]

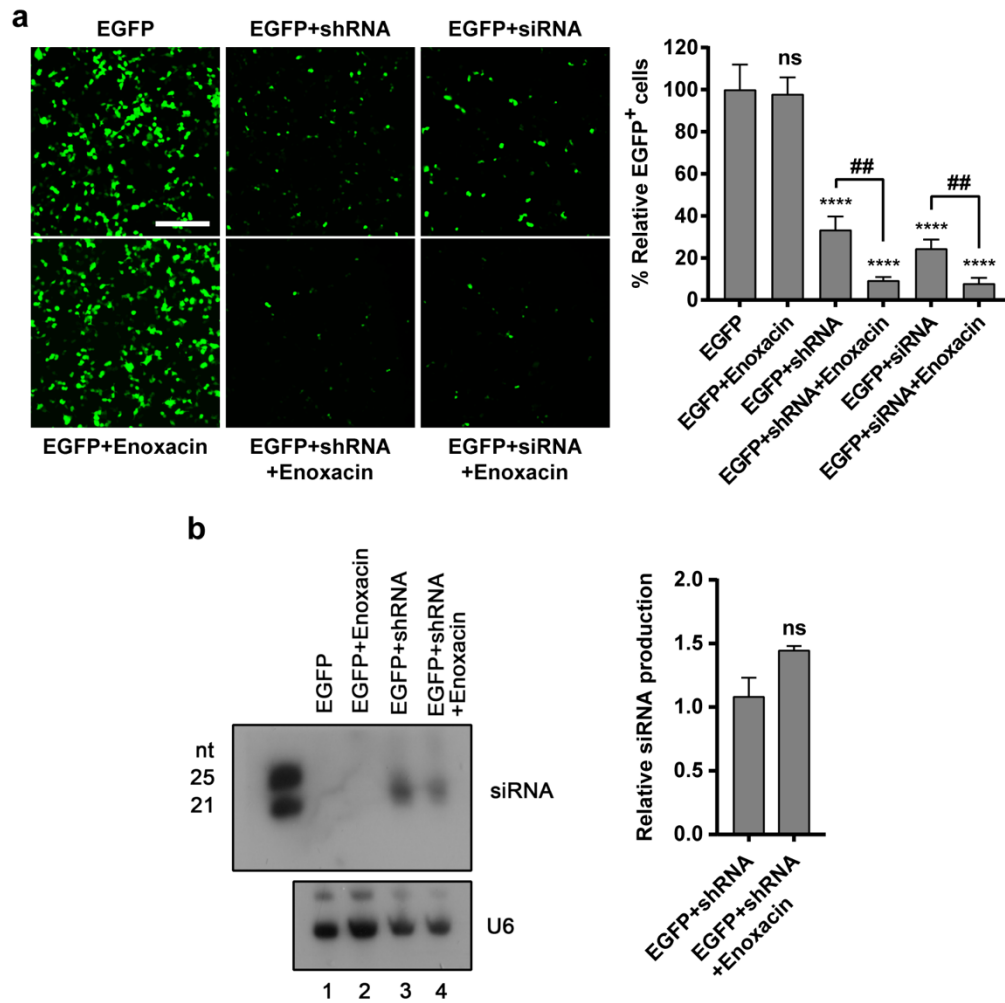

**Fig. S6. Enoxacin potently enhances RNAi response by promoting RISC activity.**

**a**, Fluorescent images of 293T-EGFP cells in the absence or presence of enoxacin (50  $\mu$ M) are shown on the left. Cells treated with EGFP-shRNA or EGFP-shRNA plus enoxacin are shown in the middle panels. Cells treated with 10  $\mu$ M EGFP-siRNA or EGFP-siRNA plus enoxacin are shown in the right panels. The EGFP<sup>+</sup> cells were quantified and cells treated with DMSO was defined as 100%. Scale bar, 100  $\mu$ m. All data are shown as means  $\pm$  SD, one-way ANOVA, ##  $p < 0.01$ , \*\*\*\*  $p < 0.0001$ . **b**, Northern blots of EGFP-siRNA in 293T cells, in which cells were treated with DMSO, enoxacin, EGFP-shRNA, or EGFP-shRNA together with enoxacin. The treatment with enoxacin did not promote the production of EGFP-siRNA from EGFP-shRNA. siRNA

production was quantified and cells treated with shRNA was defined as 1. All data are shown as means  $\pm$  SD, t test. U6 was used as the internal reference (Supplementary Table 4).
