# Supplementary material
Source: PubMed Central journal article supplement (PMC6461993)
Supplement: 41422_2019_152_MOESM7_ESM.pdf [file 41422_2019_152_MOESM7_ESM.pdf]

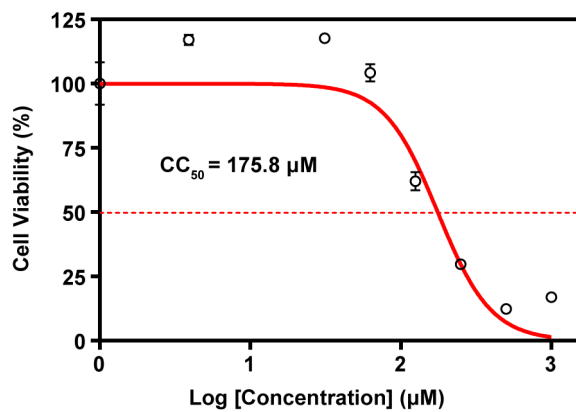

**Fig. S7. The cytotoxicity of enoxacin to hNPCs.**

Standard cell viability assay was performed to determine the cytotoxicity of enoxacin in hNPCs. The experimental data was fitted using a sigmoidal function.
