# Supplementary material
Source: PubMed Central journal article supplement (PMC6461993)
Supplement: 41422_2019_152_MOESM8_ESM.pdf [file 41422_2019_152_MOESM8_ESM.pdf]

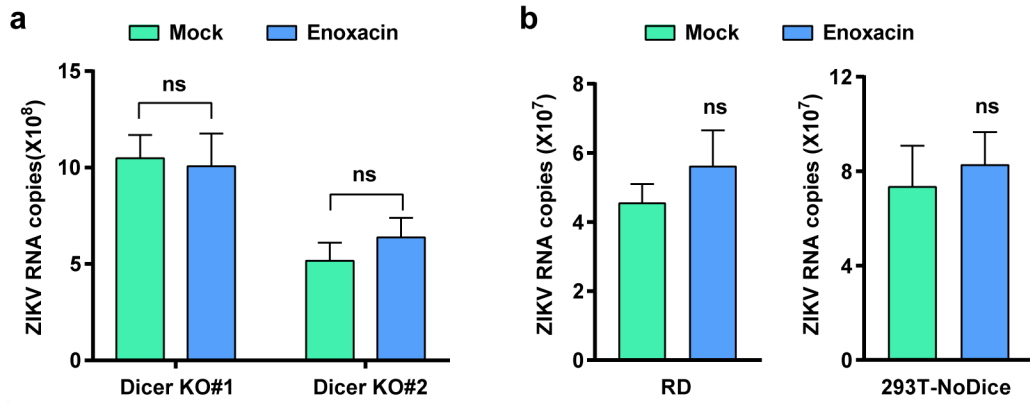

**Fig. S8. The antiviral activity of enoxacin is dependent on RNAi machinery.**

The Dicer KO hNPCs (a), RD or 293T-NoDice cells (b) were treated with enoxacin (100  $\mu$ M) for 24 hrs, and then infected with ZIKV at an MOI of 2. At 48 h.p.i., ZIKV genome RNA copies in cell culture supernatants were examined by RT-qPCR (Supplementary Table 3). All data are shown as means  $\pm$  SD of three independent experiments, *t* test.
