# Supplementary material
Source: PubMed Central journal article supplement (PMC6461993)
Supplement: 41422_2019_152_MOESM9_ESM.pdf [file 41422_2019_152_MOESM9_ESM.pdf]

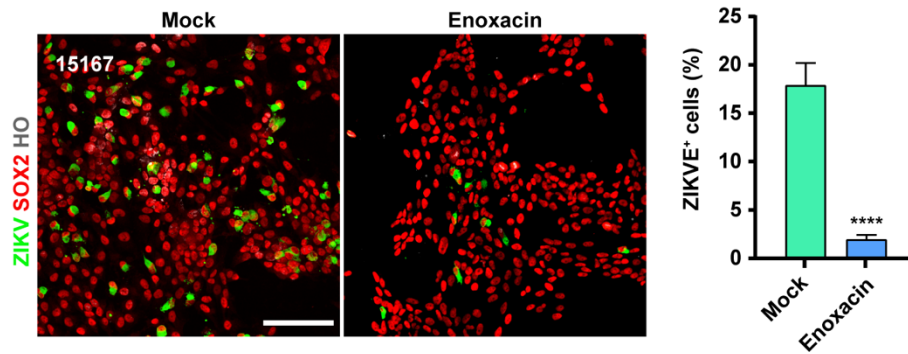

**Fig. S9. Enoxacin shows anti-ZIKV activity in clinically isolated hNPCs.**

The isolated hNPC 15167 cells were treated with enoxacin (100  $\mu$ M) for 24 hrs and then infected with ZIKV (GZ01) at an MOI of 2. Immunofluorescence assays were performed at 48 h.p.i. using antibodies against ZIKV E (Green), SOX2 (Red), and HO (grey). Scale bar, 100  $\mu$ m. The infection rate of ZIKV was quantified in the right panel.

All data are shown as means  $\pm$  SD of three independent experiments, *t* test.
