# Supplementary material
Source: PubMed Central journal article supplement (PMC6461993)
Supplement: 41422_2019_152_MOESM10_ESM.pdf [file 41422_2019_152_MOESM10_ESM.pdf]

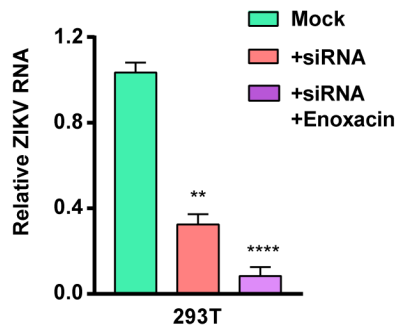

**Fig. S10. Enoxacin enhances the antiviral effects of exogenous vsiRNA mimics in 293T cells.**

293T cells were treated with synthetic ZIKV-specific siRNA mimic (10  $\mu$ M, Supplementary Table 4) or siRNA plus enoxacin (100  $\mu$ M) for 24 hrs, and then infected with ZIKV at an MOI of 2. ZIKV genome RNA were determined by RT-qPCR at 48 h.p.i, and the level of ZIKV RNA in N.C. siRNA treated cells (Mock) was defined as 1. All data are shown as means  $\pm$  SD of two independent experiments, one-way ANOVA, \*\*  $p < 0.01$ , \*\*\*\*  $p < 0.0001$ .
