# Supplementary material
Source: PubMed Central journal article supplement (PMC6461993)
Supplement: 41422_2019_152_MOESM11_ESM.pdf [file 41422_2019_152_MOESM11_ESM.pdf]

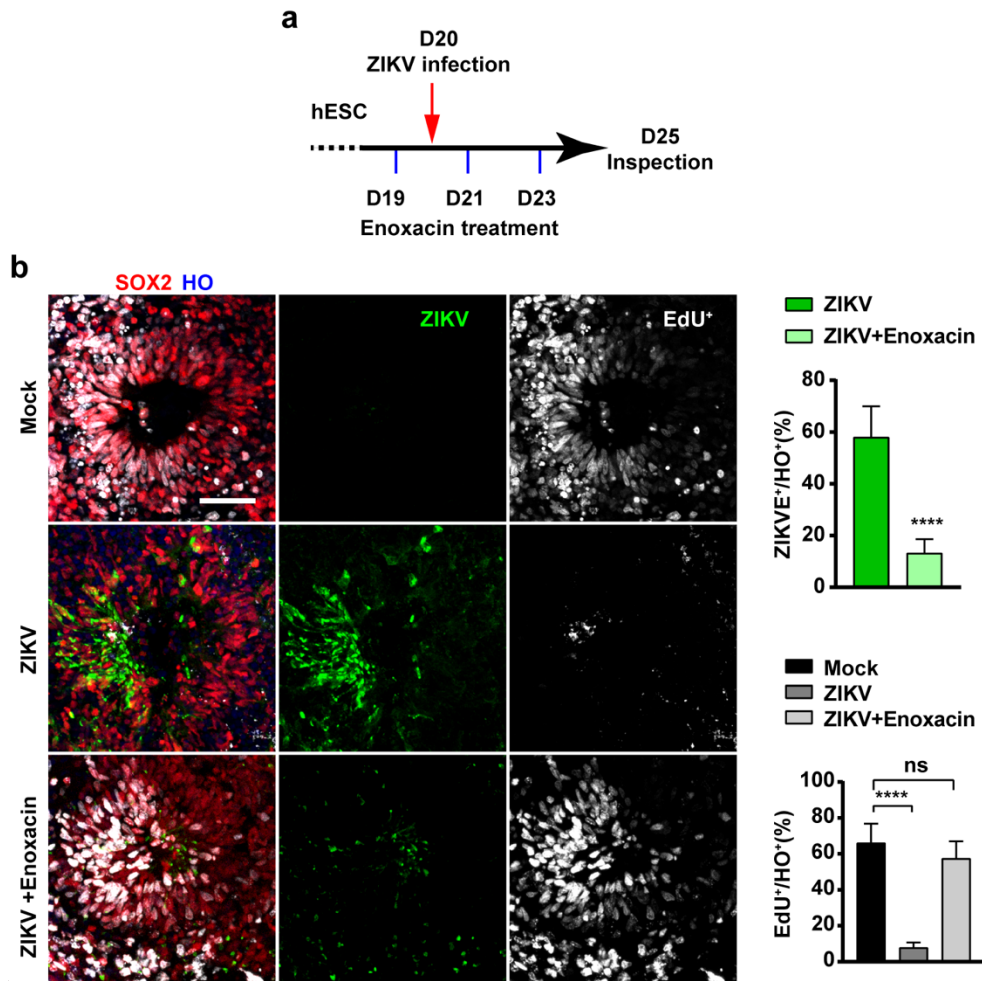

**Fig. S11. Enoxacin treatment prevents ZIKV infection in the D20 brain organoids.**

**a**, Schematic diagram for the experimental process. The D20 organoids were treated with 100  $\mu$ M enoxacin for 24 hrs before ZIKV infection, and the medium were replaced with fresh medium containing 100  $\mu$ M enoxacin every 2 days. **b**, Immunostaining assays of D20 organoids were performed at 5 days post infection. ZIKV E protein (Green), SOX2 protein (Red), HO (Blue), EdU<sup>+</sup> (Gray). Scale bar, 50  $\mu$ m. The percentages of ZIKV E and EdU<sup>+</sup> cells were quantified and normalized to the total number of HO<sup>+</sup> cells. All data are shown as means  $\pm$  SD (n=5 organoids), *t* test and one-way ANOVA, \*\*\*\*  $p < 0.0001$ .
