# Supplementary material
Source: PubMed Central journal article supplement (PMC6461993)
Supplement: 41422_2019_152_MOESM12_ESM.pdf [file 41422_2019_152_MOESM12_ESM.pdf]

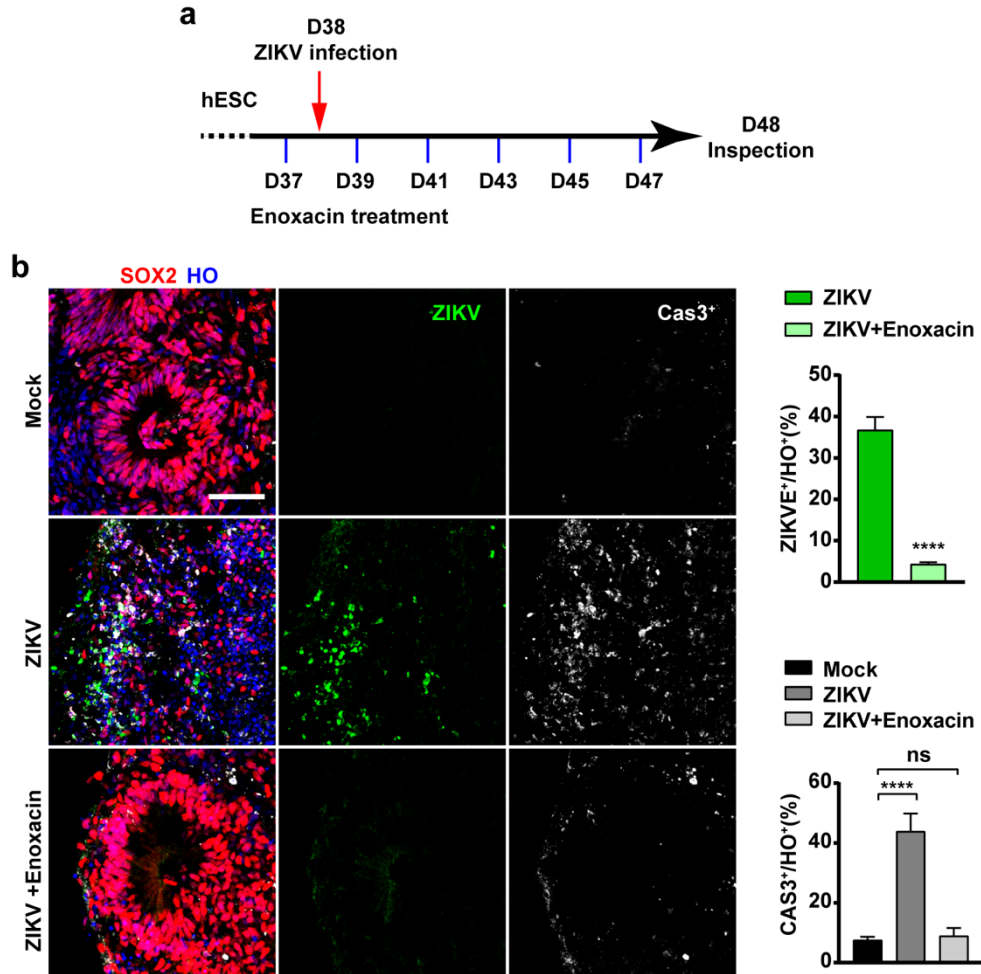

**Fig. S12. The anti-ZIKV activity of enoxacin in the D38 brain organoids.**

**a**, Schematic diagram for the experimental process. The D30 organoids were treated with 100  $\mu$ M enoxacin for 24 hrs before ZIKV infection, and the medium were replaced with fresh medium containing 100  $\mu$ M enoxacin every 2 days. **b**, Immunostaining assay of the D38 organoids at 10 days post ZIKV infection. ZIKV E (Green), SOX2 (Red), HO (Blue), Cas3<sup>+</sup> (Gray). Scale bar, 50  $\mu$ m. The percentages of ZIKVE and Cas3<sup>+</sup> cells were quantified and normalized to the total number of HO<sup>+</sup> cells. All data are shown as means  $\pm$  SD (n = 4 organoids), one-way ANOVA, \*\*\*\* p<0.0001.
