# Supplementary material
Source: PubMed Central journal article supplement (PMC6461993)
Supplement: 41422_2019_152_MOESM13_ESM.pdf [file 41422_2019_152_MOESM13_ESM.pdf]

**Table S1. Deep sequencing profiles of viral small RNAs in different cells infected with ZIKV**

|                             | ZIKV in hNPCs #1 | ZIKV in hNPCs #2 | ZIKV in Aag2 | ZIKV in RD  | ZIKV in hNeuron |
|-----------------------------|------------------|------------------|--------------|-------------|-----------------|
| Total Reads                 | 27801388         | 24529714         | 39129777     | 22352080    | 30140793        |
| miRNA                       | 1624196          | 771289           | 12377        | 466840      | 2698406         |
| Total virus reads           | 27357            | 21848            | 57691        | 25213       | 55256           |
| Virus reads (21-23 nt)      | 17226            | 13364            | 42932        | 7457        | 10370           |
| % of total virus reads      | 62.96743064      | 61.1680703       | 74.41715346  | 29.57601237 | 18.7671927      |
| (+)-stranded reads          | 11331            | 8742             | 26097        | 7439        | 10034           |
| % of virus reads (21-23 nt) | 65.7784744       | 65.41454654      | 60.78682568  | 99.75861607 | 96.75988428     |
| (-)-stranded reads          | 5895             | 4622             | 16835        | 18          | 336             |
| % of virus reads (21-23 nt) | 34.2215256       | 34.58545346      | 39.21317432  | 0.241383935 | 3.240115718     |
