# Supplementary material
Source: PubMed Central journal article supplement (PMC6461993)
Supplement: 41422_2019_152_MOESM14_ESM.pdf [file 41422_2019_152_MOESM14_ESM.pdf]

**Table S2. The gRNAs sequences for targeting human DICER1 locus and primers for genotyping**

|              |                      |
|--------------|----------------------|
| gRNA1        | CTCACCAGTATCAACCGACT |
| gRNA2        | GCCGTGTTGATTGTGACTCG |
| gRNA3        | ACTCGTGGACCACCATCGTC |
| DICER1 anti  | GTAAGGGTCTCCATACGAT  |
| DICER1 sense | TGCCAAGGAATACTGAACT  |
