# Supplementary material
Source: PubMed Central journal article supplement (PMC6461993)
Supplement: 41422_2019_152_MOESM15_ESM.pdf [file 41422_2019_152_MOESM15_ESM.pdf]

**Table S3. Primers and probes for RT-qPCR used in this study**

|                     |                                 |
|---------------------|---------------------------------|
| ZIKV-anti           | GGTCAGCGTCCTCTCTAATAAACG        |
| ZIKV-sense          | GCACCCTAGTGTCCACTTTTTCC         |
| ZIKV-Probe          | FAM-AGCCATGACCGACACCACACCGT-BQ1 |
| INF $\alpha$ -anti  | GCCTCGCCCTTTGCTTTACT            |
| INF $\alpha$ -sense | CTGTGGGTCTCAGGGAGATCA           |
| INF $\beta$ -anti   | ATGACCAACAAGTGTCTCCTCC          |
| INF $\beta$ -sense  | GGAATCCAAGCAAGTTGTAGCTC         |
| IFN $\gamma$ -anti  | TCGGTAACTGACTTGAATGTCCA         |
| IFN $\gamma$ -sense | TCGCTTCCCTGTTTTAGCTGC           |
| ISG15-anti          | GAGAGGCAGCGAACTCATCT            |
| ISG15-sense         | CTTCAGCTCTGACACCGACA            |
| ISG56-anti          | TTGATGACGATGAAATGCCTGA          |
| ISG56-sense         | CAGGTCACCAGACTCCTCAC            |
| IFITM3-anti         | CATCCTCATGACCATTCTGC            |
| IFITM3-sense        | TCAGTGATGCCTCCTGATCT            |
| Mx1-anti            | GTTTCCGAAGTGGACATCGCA           |
| Mx1-sense           | CTGCACAGGTTGTTCTCAGC            |
