# Supplementary material
Source: PubMed Central journal article supplement (PMC6461993)
Supplement: 41422_2019_152_MOESM16_ESM.pdf [file 41422_2019_152_MOESM16_ESM.pdf]

**Table S4. Oligonucleotides used in this study**

|                    |                                 |
|--------------------|---------------------------------|
| si-N.C.-sense-1    | UUCUCCGAACGUGUCACGUtt           |
| si-hDicer1-sense-1 | ACCACUGAUUCUGCAUAUGtt           |
| si-hDicer1-sense-2 | CUGCUCGAAAUCUUACGCAtt           |
| si-hAgo2-sense-1   | CAUUAUGAAUUGGAUAUCAtt           |
| si-hAgo2-sense-2   | GGUCUAAAGGUGGAGAUAAtt           |
| si-ZIKV-sense-1    | --UGCGACAGUUCGAGUUUGAAGC        |
| si-ZIKV-sense-2    | --AAAGACCAGAGACUCCAUGAGU        |
| si-EGFP-sense      | GCAAGCUGACCCUGAAGUUCAUC         |
| si-EGFP-Probe      | DIG-GCAAGCUGACCCUGAAGUUCAUC-DIG |
| miR-92a-Probe      | DIG-ACAGGCCGGGACAAGUGCAAUA-DIG  |
| U6-Probe           | DIG-GCAGGGGCCAUGC UAAUCUUCU-DIG |
